# Supplementary material for: Worldwide Research Trends on Solar-Driven Water Disinfection
Source: MDPI journal article supplement (doi:10.3390/ijerph18179396), 2021-09-06
Supplement: s1 [file s1]

## SUPPORTING INFORMATION

### WORLDWIDE RESEARCH TRENDS ON SOLAR-DRIVEN WATER DISINFECTION

Ballesteros Martín MM<sup>a,\*</sup>, Brindley C<sup>b</sup>, Sánchez Pérez JA<sup>b,c</sup> and Fernández-Ibañez P<sup>d,\*\*</sup>

<sup>a,\*</sup>Molecular Biology and Biochemical Engineering Dpt., Experimental Sciences Faculty, Pablo de Olavide University, Ctra. de Utrera km 1, Seville, 41013, Spain

<sup>b</sup>Department of Chemical Engineering, University of Almería, Almería, Spain

<sup>c</sup>CIESOL, Joint Centre of the University of Almería-CIEMAT, Almería, 04120, Spain

<sup>d,\*\*</sup>Nanotechnology and Integrated BioEngineering Centre, School of Engineering, Ulster University, Northern Ireland, BT37 0QB, United Kingdom

\*Corresponding author: e-mail: mmbalmar@upo.es

\*\*Corresponding author: e-mail: p.fernandez@ulster.ac.uk

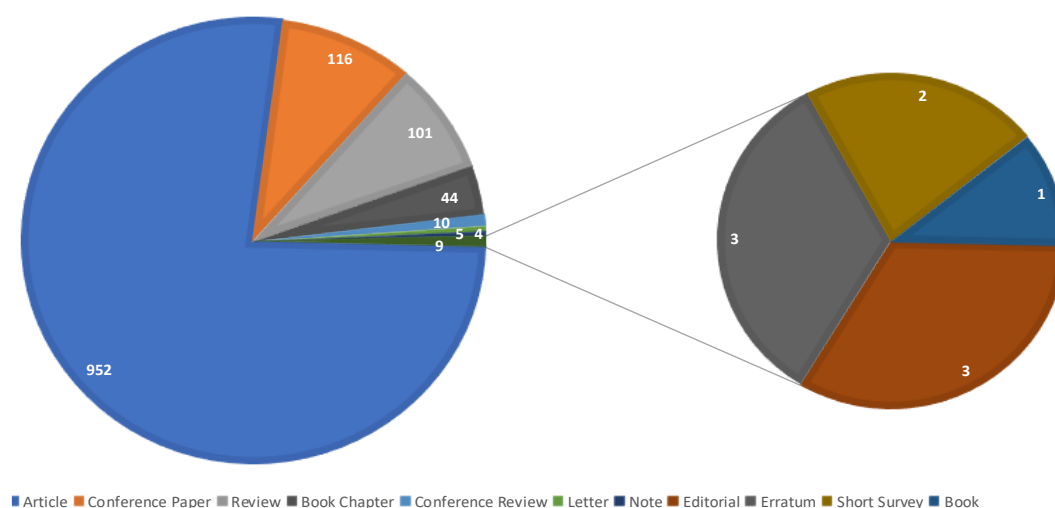

**Figure S1:** Types of documents in the field of research of solar-driven water disinfection from 1977 to 2020.

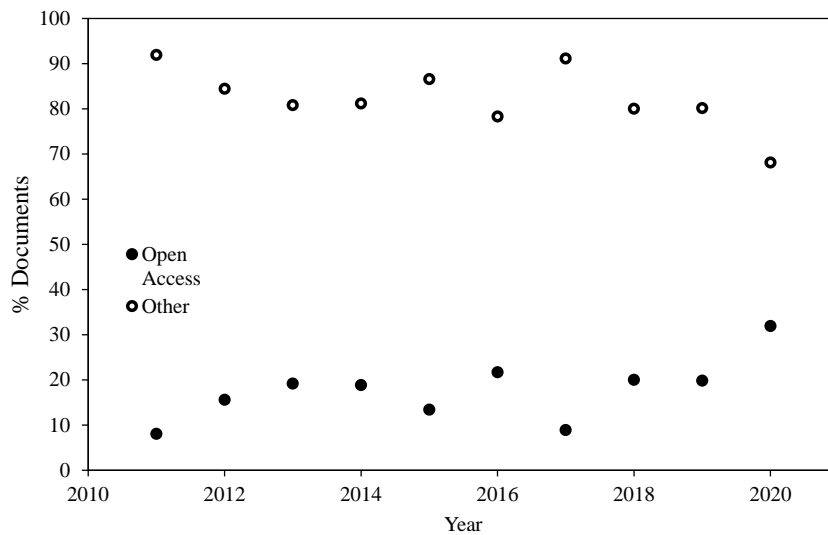

**Figure S2:** Evolution of the percentages of documents published Open Access and other over the last 10 years in the field of solar-driven water disinfection.

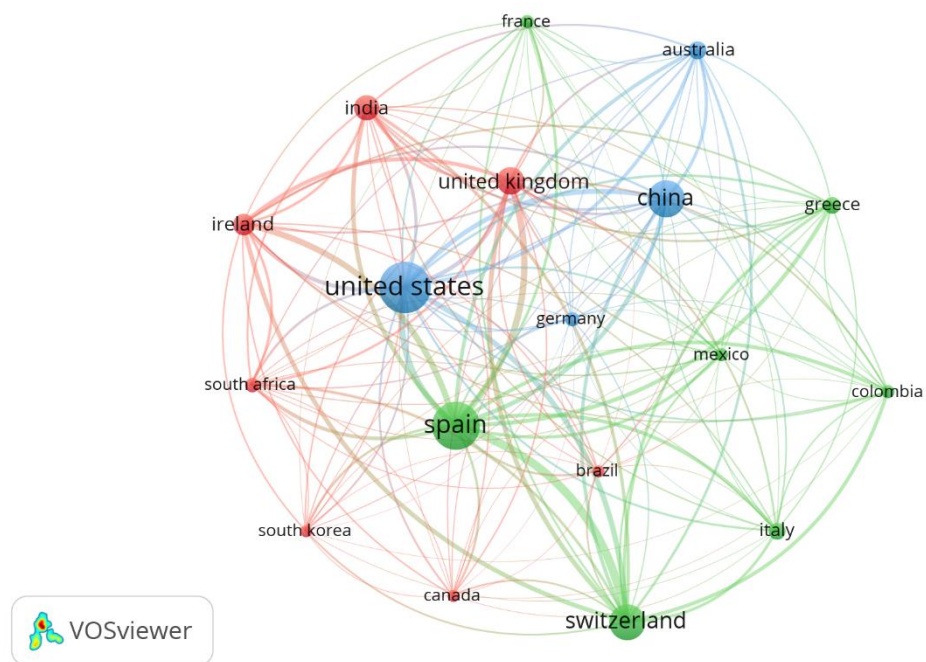

**Figure S3:** Relationships between the different countries that collaborate with joint publications on solar-driven water disinfection.

**Table S1:** Funding sponsor of publications on solar-driven water disinfection.

| <b>Sponsor</b>                                                             | <b>Country</b> | <b>Documents</b> |
|----------------------------------------------------------------------------|----------------|------------------|
| National Natural Science Foundation of China                               | China          | 73               |
| European Commission                                                        | Europe         | 47               |
| National Science Foundation                                                | United States  | 29               |
| European Regional Development Fund                                         | Europe         | 20               |
| Fundamental Research Funds for the Central Universities                    | China          | 15               |
| Ministerio de Ciencia e Innovación                                         | Spain          | 15               |
| Direktion für Entwicklung und Zusammenarbeit                               | Switzerland    | 12               |
| Horizon 2020 Framework Programme                                           | Europe         | 12               |
| Ministerio de Economía y Competitividad                                    | Spain          | 11               |
| Schweizerische Nationalfondszur Förderung der wissenschaftlichen Forschung | Switzerland    | 11               |
